# Supplementary material for: Facile hydrothermal synthesis and formation mechanisms of Bi2Te3, Sb2Te3 and Bi2Te3–Sb2Te3 nanowires
Source: Royal Society of Chemistry journal article supplement (doi:10.1039/c5ra20014h), 2015-01-01
Supplement: c5ra20014h1.pdf [file c5ra20014h1.pdf]

Electronic Supplementary Information (ESI) for  
**Facile hydrothermal synthesis and formation mechanisms of Bi<sub>2</sub>Te<sub>3</sub>,  
Sb<sub>2</sub>Te<sub>3</sub> and Bi<sub>2</sub>Te<sub>3</sub>-Sb<sub>2</sub>Te<sub>3</sub> nanowires**

Hongqing Feng,<sup>a</sup> Chunyang Wu,<sup>b</sup> Peng Zhang,<sup>a</sup> Jianli Mi<sup>\*a</sup> and Mingdong Dong<sup>\*c</sup>

<sup>a</sup>*Institute for Advanced Materials, School of Materials Science and Engineering, Jiangsu University, Zhenjiang 212013, China. E-mail: [jlmi@ujs.edu.cn](mailto:jlmi@ujs.edu.cn)*

<sup>b</sup>*Department of Materials Science and Engineering, Zhejiang University, Hangzhou 310027, China*

<sup>c</sup>*Interdisciplinary Nanoscience Center (iNANO), Aarhus University, 8000 Aarhus C, Denmark. E-mail: [dong@inano.au.dk](mailto:dong@inano.au.dk)*

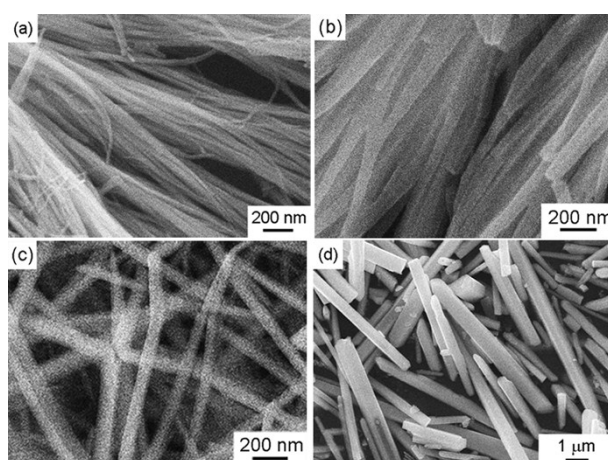

**Fig. S1** SEM images of Te samples prepared under (a) 0.2 M HCl, (b) no pH additive, (c) 0.2 M NaOH and (d) 0.6 M NaOH.

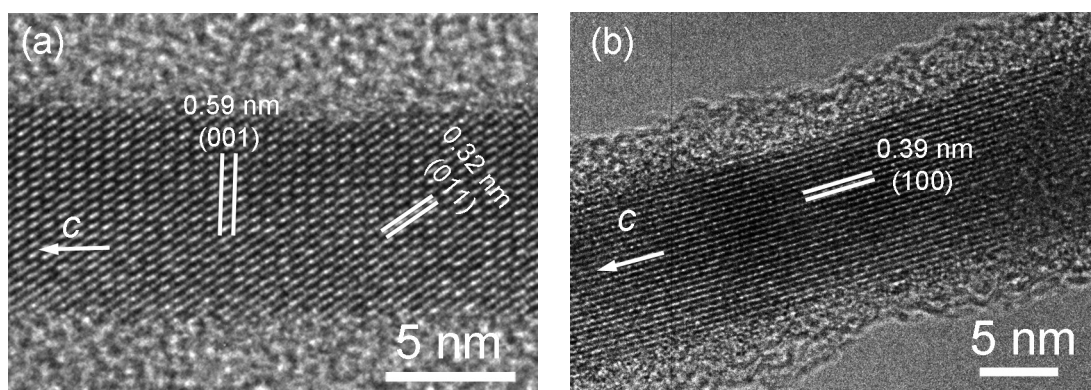

**Fig. S2** HRTEM images of Te nanowires with different diffraction fringers, all of which show the wire axes parallel to  $c$  direction.

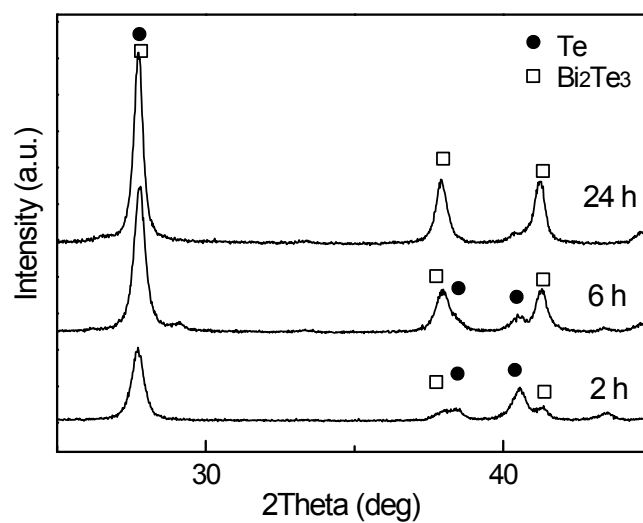

**Fig. S3** XRD patterns of  $\text{Bi}_2\text{Te}_3$  samples prepared at  $180\text{ }^\circ\text{C}$  for 2 h, 6 h, and 24 h, respectively. It shows that Te nanowires are initially formed and they act as templates for the formation of  $\text{Bi}_2\text{Te}_3$  nanowires.

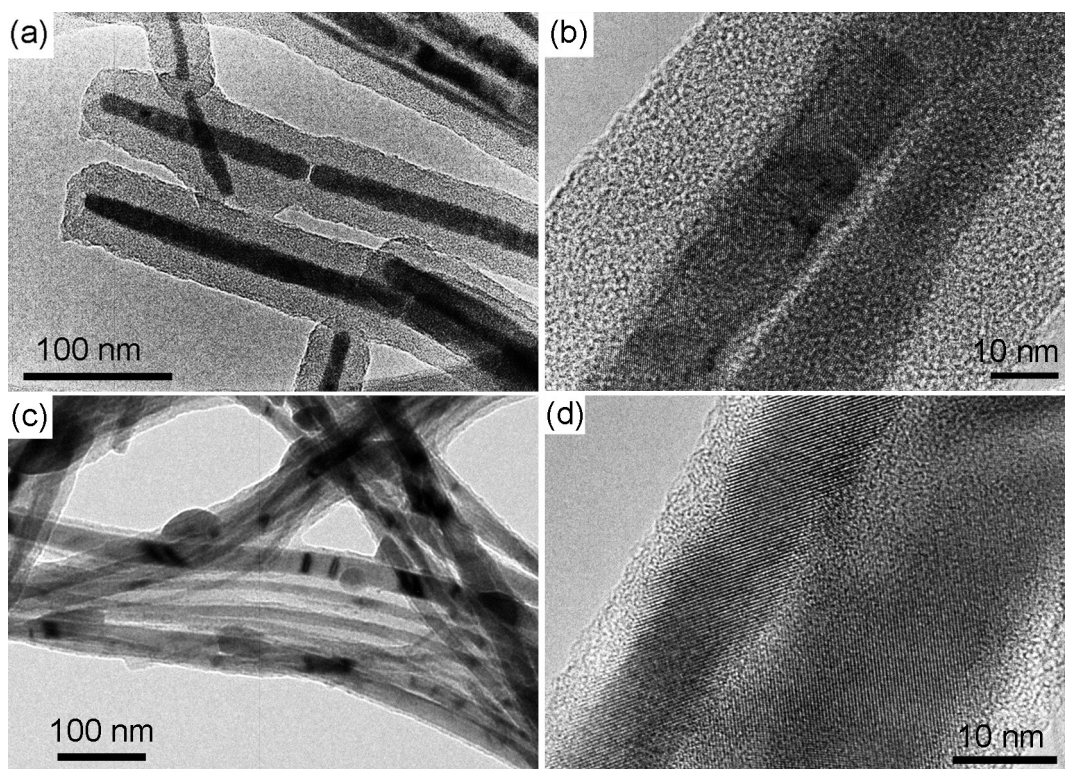

**Fig. S4** (a,b) TEM images of as-prepared  $\text{Bi}_2\text{Te}_3$  nanowires coated with a thicker amorphous layer. (c,d) TEM images of the  $\text{Bi}_2\text{Te}_3$  nanowires after washed with N,N-Dimethylformamide (DMF), indicating that the amorphous layer is partially removed.

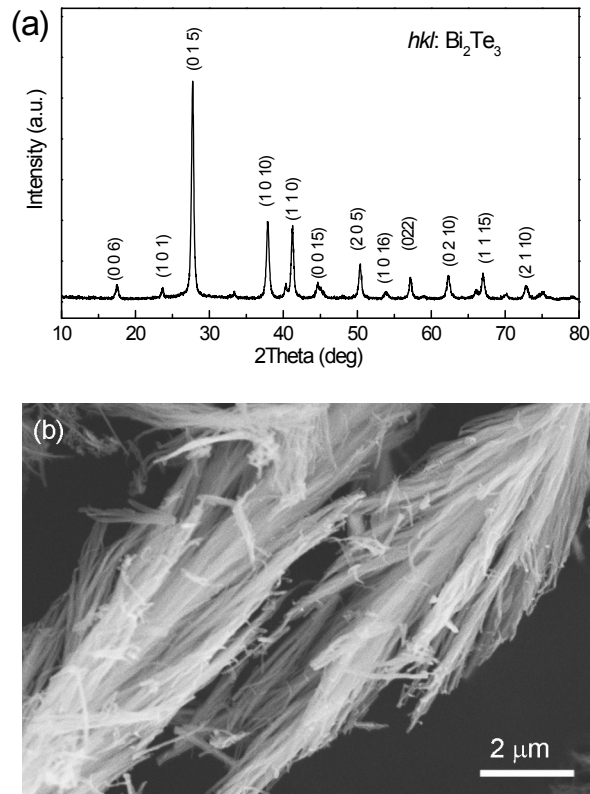

**Fig. S5** (a) XRD pattern of  $\text{Bi}_2\text{Te}_3$  nanowires prepared under 0.2 M HCl without EDTA at 180 °C for 24 h, showing pure  $\text{Bi}_2\text{Te}_3$  can be obtained. (b) SEM image of the as-prepared  $\text{Bi}_2\text{Te}_3$  sample. It shows that  $\text{Bi}_2\text{Te}_3$  nanowires can be also obtained without EDTA under acidic condition indicating the role of surfactant EDTA for directing the special morphology is limited.

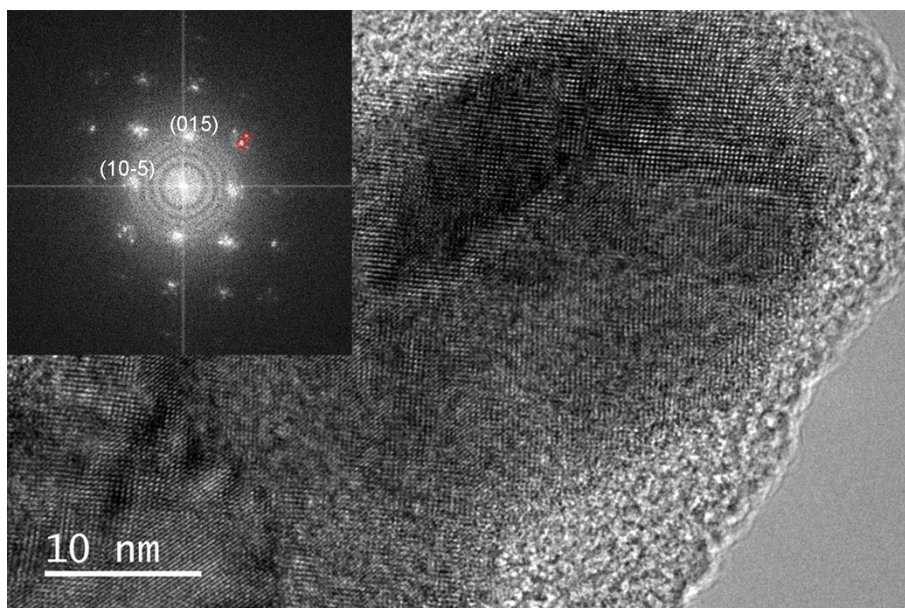

**Fig S6** HRTEM image of  $\text{Bi}_2\text{Te}_3\text{-Sb}_2\text{Te}_3$  nanowire and the fast Fourier transform (FFT) of the lattice-resolved image. It indicates that there are lattice fluctuations in the structure.

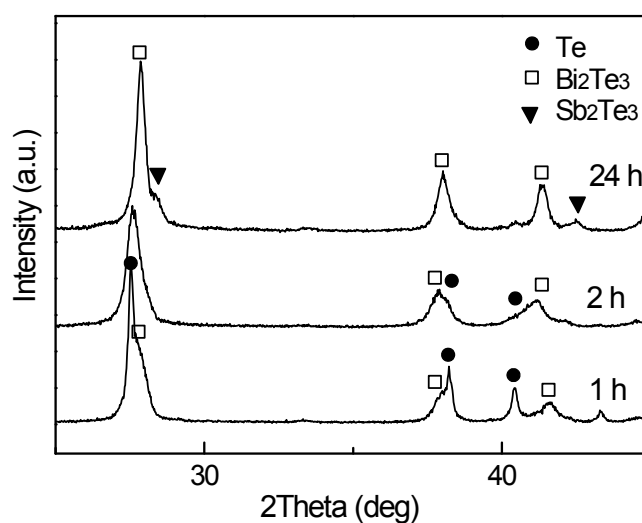

**Fig. S7** XRD patterns of  $\text{Bi}_2\text{Te}_3\text{-Sb}_2\text{Te}_3$  samples prepared by two steps hydrothermal synthesis. After the first step synthesis of Te nanowires at 150 °C for 12 h under acidic condition of 0.2 M HCl, precursors of 0.125 mmol  $\text{BiCl}_3$  and 0.125 mmol  $\text{SbCl}_3$  and 0.192 g NaOH were added in the autoclave for the second step synthesis at 220 °C. The reaction times for the second step were 1 h, 2 h, and 24 h, respectively. It shows that the formation of  $\text{Bi}_2\text{Te}_3$  precedes to  $\text{Sb}_2\text{Te}_3$ .
